# Supplementary material for: Role of Two Plant Growth-Promoting Bacteria in Remediating Cadmium-Contaminated Soil Combined with Miscanthus floridulus (Lab.)
Source: MDPI journal article supplement (doi:10.3390/plants10050912), 2021-05-02
Supplement: s1 [file s1]

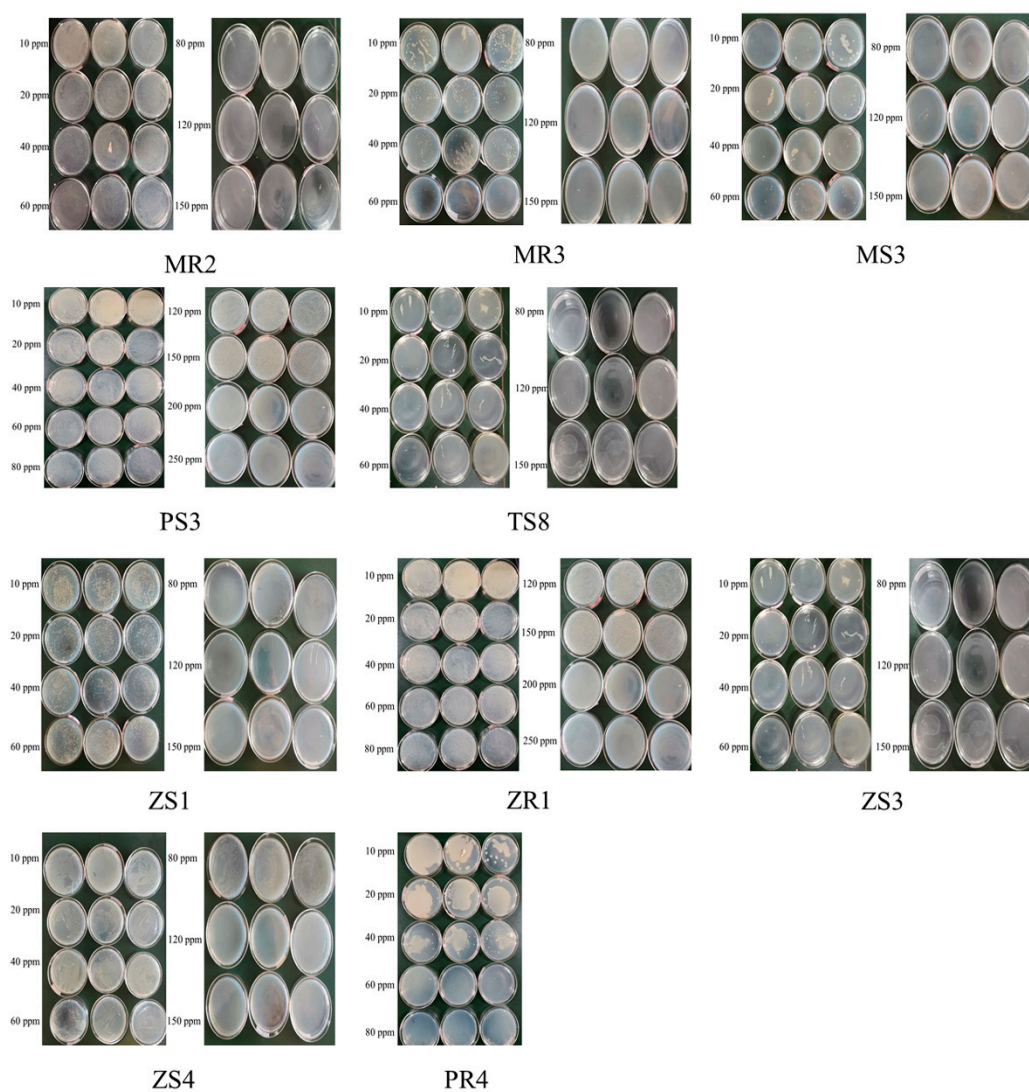

Figure S1 Heavy metal maximum tolerance concentration of ten functional bacteria in the plates
