# Supplementary material for: Role of Two Plant Growth-Promoting Bacteria in Remediating Cadmium-Contaminated Soil Combined with Miscanthus floridulus (Lab.)
Source: MDPI journal article supplement (doi:10.3390/plants10050912), 2021-05-02
Supplement: s1 [file s1]

**Table 1** Contents of Cd in reference materials

| Metal | Reference         | material    | Digestion in our laboratory |              |                |
|-------|-------------------|-------------|-----------------------------|--------------|----------------|
|       | certified content |             |                             |              |                |
|       | mg/kg             | uncertainty | mg/kg                       | recovery (%) | difference (%) |
| Cd    | 6.10              | 0.70        | 5.83                        | 95.57%       | -4.43%         |
