# Supplementary figures and images for: Role of Two Plant Growth-Promoting Bacteria in Remediating Cadmium-Contaminated Soil Combined with Miscanthus floridulus (Lab.)
Source: MDPI journal article supplement (doi:10.3390/plants10050912), 2021-05-02

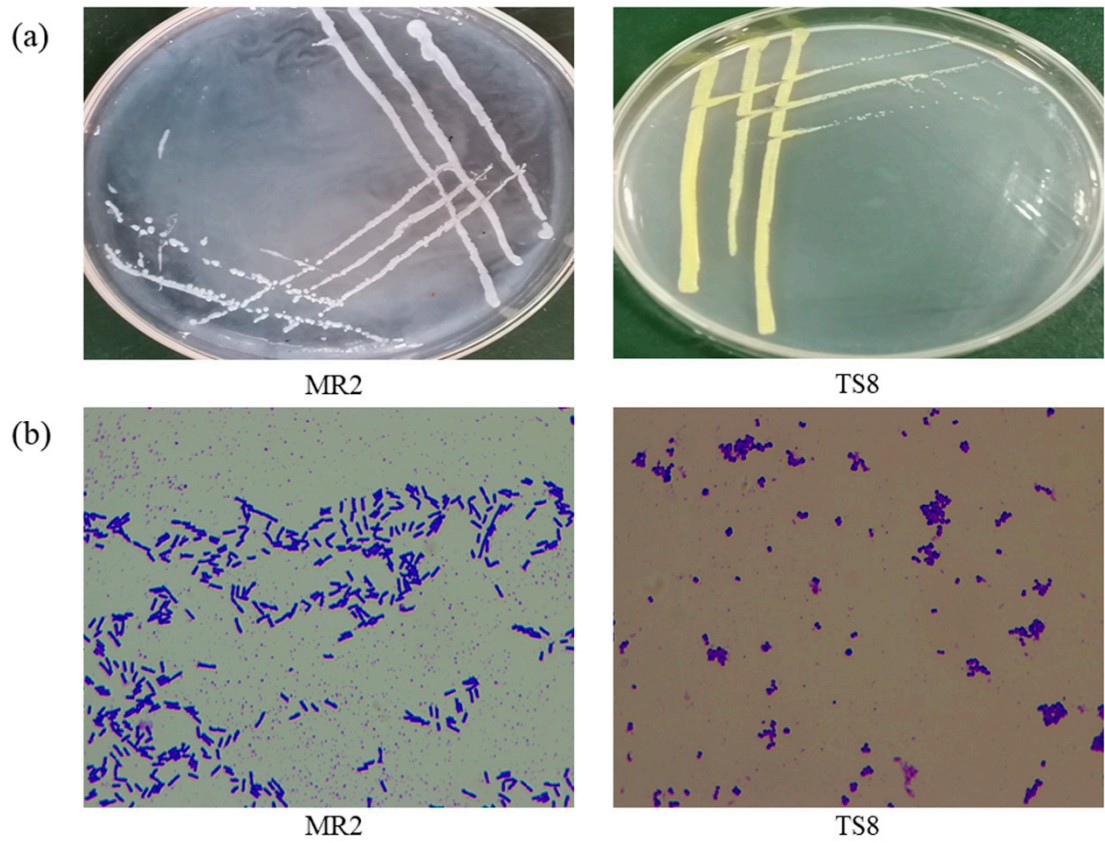

Figure S2. Results of selected PCGPB morphological identifications. (a) plate; (b) simple

Supplement: s1 [file s1]
